# Supplementary material for: Public Maternal Health Dashboards in the United States: Descriptive Assessment
Source: J Med Internet Res. 2024 Sep 17;26:e56804. doi: 10.2196/56804 (PMC11445621; doi:10.2196/56804)
Supplement: Multimedia Appendix 4 [file jmir_v26i1e56804_app4.docx]

**Supplemental File 4. Indicator Reporting Time Periods**

| Category |  |  | Time Period1 | | | |
| --- | --- | --- | --- | --- | --- | --- |
| Any Indicator |  | Annual | Quarterly | Monthly | Multiyear/ Other2 |
| **Health status** |  |  |  |  |  |  |
| Birthweight | 54 (68%) |  | 41 (51%) | 1 (1%) | 0 (0%) | 14 (18%) |
| Preterm birth | 45 (56%) |  | 38 (48%) | 1 (1%) | 0 (0%) | 8 (10%) |
| Infant mortality | 42 (53%) |  | 33 (41%) | 0 (0%) | 0 (0%) | 12 (15%) |
| Births | 38 (48%) |  | 30 (38%) | 1 (1%) | 2 (3%) | 11 (14%) |
| Mode of delivery | 21 (26%) |  | 20 (25%) | 1 (1%) | 0 (0%) | 1 (1%) |
| Pregnancy-related problems | 16 (20%) |  | 13 (16%) | 1 (1%) | 0 (0%) | 2 (3%) |
| Maternal depression/anxiety | 14 (18%) |  | 11 (14%) | 0 (0%) | 0 (0%) | 4 (5%) |
| Severe maternal morbidity | 12 (15%) |  | 10 (13%) | 1 (1%) | 0 (0%) | 1 (1%) |
| Maternal mortality | 10 (13%) |  | 7 (9%) | 0 (0%) | 0 (0%) | 4 (5%) |
| Birth defects | 9 (11%) |  | 7 (9%) | 0 (0%) | 0 (0%) | 3 (4%) |
| Neonatal abstinence syndrome | 8 (10%) |  | 7 (9%) | 0 (0%) | 0 (0%) | 3 (4%) |
| Other | 14 (18%) |  | 14 (18%) | 0 (0%) | 0 (0%) | 2 (3%) |
| **Health behaviors and healthcare utilization** | | | | | | |
| Prenatal care | 57 (71%) |  | 47 (59%) | 0 (0%) | 1 (1%) | 12 (15%) |
| Maternal smoking | 42 (53%) |  | 35 (44%) | 0 (0%) | 1 (1%) | 9 (11%) |
| Breastfeeding | 22 (28%) |  | 19 (24%) | 0 (0%) | 0 (0%) | 3 (4%) |
| Substance use | 14 (18%) |  | 13 (16%) | 0 (0%) | 0 (0%) | 2 (3%) |
| Oral health | 13 (16%) |  | 12 (15%) | 0 (0%) | 0 (0%) | 1 (1%) |
| Postpartum care | 12 (15%) |  | 9 (11%) | 0 (0%) | 0 (0%) | 4 (5%) |
| Maternal nutrition | 11 (14%) |  | 8 (10%) | 0 (0%) | 0 (0%) | 3 (4%) |
| Immunization | 10 (13%) |  | 9 (11%) | 0 (0%) | 0 (0%) | 1 (1%) |
| Contraception | 9 (11%) |  | 9 (11%) | 0 (0%) | 0 (0%) | 1 (1%) |
| Preventative visit | 5 (6%) |  | 5 (6%) | 0 (0%) | 0 (0%) | 0 (0%) |
| Smoking household | 5 (6%) |  | 5 (6%) | 0 (0%) | 0 (0%) | 0 (0%) |
| Other | 19 (24%) |  | 19 (24%) | 0 (0%) | 0 (0%) | 2 (3%) |
| **Individual characteristics and risk factors** | | | | | | |
| Maternal age | 43 (54%) |  | 32 (40%) | 1 (1%) | 0 (0%) | 10 (13%) |
| Preconception health | 18 (23%) |  | 15 (19%) | 0 (0%) | 0 (0%) | 3 (4%) |
| Maternal BMI | 17 (21%) |  | 15 (19%) | 0 (0%) | 1 (1%) | 2 (3%) |
| Health insurance status | 17 (21%) |  | 15 (19%) | 0 (0%) | 1 (1%) | 2 (3%) |
| Maternal education | 17 (21%) |  | 14 (18%) | 0 (0%) | 1 (1%) | 3 (4%) |
| Pregnancy intention | 13 (16%) |  | 12 (15%) | 0 (0%) | 0 (0%) | 1 (1%) |
| Stress/abuse | 11 (14%) |  | 9 (11%) | 0 (0%) | 0 (0%) | 2 (3%) |
| Maternal marital status | 10 (13%) |  | 9 (11%) | 0 (0%) | 1 (1%) | 1 (1%) |
| Plurality | 9 (11%) |  | 9 (11%) | 0 (0%) | 1 (1%) | 0 (0%) |
| Birth spacing | 7 (9%) |  | 6 (8%) | 0 (0%) | 1 (1%) | 1 (1%) |
| Number of prior births | 7 (9%) |  | 7 (9%) | 0 (0%) | 1 (1%) | 0 (0%) |
| Maternal race/ethnicity | 5 (6%) |  | 3 (4%) | 1 (1%) | 0 (0%) | 1 (1%) |
| Other | 2 (3%) |  | 2 (3%) | 0 (0%) | 0 (0%) | 0 (0%) |
| **Health system characteristics** | | | | | | |
| Population characteristics | 18 (23%) |  | 17 (21%) | 0 (0%) | 1 (1%) | 4 (5%) |
| WIC access | 16 (20%) |  | 10 (13%) | 0 (0%) | 1 (1%) | 5 (6%) |
| Availability of maternity care | 12 (15%) |  | 7 (9%) | 1 (1%) | 0 (0%) | 6 (8%) |
| Policy measures | 4 (5%) |  | 3 (4%) | 0 (0%) | 0 (0%) | 1 (1%) |
| Healthcare expenditures | 2 (3%) |  | 2 (3%) | 0 (0%) | 0 (0%) | 0 (0%) |
| Other | 3 (4%) |  | 2 (3%) | 0 (0%) | 0 (0%) | 1 (1%) |

Notes: 1The denominator for each percentage reported in this table is 80 dashboards. Dashboards may use more than one reporting format and more than one geographic level.2 The most common “other” time period was multiyear periods, such as two to three years combined. Variables reported for only one time period (e.g., a single year), or unspecified time period, are also included in “other.” Acronyms: BMI=body mass index; WIC=Special Supplemental Nutrition Program for Women, Infants, and Children.
